1 **Extracellular DNA (eDNA) enables early detection of the phenotypic switch of**  
2 ***Pseudomonas* sp. during biofilm development**

3  
4 **Fatemeh Bajoul Kakahi<sup>1</sup>, Dingrong Kang<sup>1</sup>, Daniel C. Volke<sup>2</sup>, Nicolas T. Wirth<sup>2</sup>, Pablo I.**  
5 **Nikel<sup>2</sup>, Frank Delvigne<sup>1\*</sup>**

6  
7 <sup>1</sup>Terra Research and Teaching Centre, Microbial Processes and Interactions (MiPI), Gembloux  
8 Agro-Bio Tech, University of Liege, Gembloux, Belgium.

9 <sup>2</sup>The Novo Nordisk Foundation Center for Biosustainability, Technical University of Denmark,  
10 2800 Kongens Lyngby, Denmark.

11 \*Corresponding author: [F.Delvigne@uliege.be](mailto:F.Delvigne@uliege.be)

12  
13 **Abstract**

14  
15 Microbial populations undergo phenotypic switching as a response to environmental perturbations.  
16 For instance, some bacteria switch from a planktonic lifestyle to biofilm, resulting in altered  
17 physiological properties such as increased robustness depending on the conditions. However, the  
18 precise detection of phenotypic switching events during the bacterial life cycle is still a technical  
19 challenge. Propidium iodide (PI) is one of the most frequently used fluorescence indicators for  
20 assessing cell viability based on membrane permeability, yet PI-stained cells sometimes display a  
21 red-but-not-dead phenotype. In *Escherichia coli*, this phenomenon is connected to modulation of  
22 porins in the outer membrane (OM) to adapt OM permeability according to nutrient availability.  
23 In this study, we explored PI staining to assess phenotypic changes in *Pseudomonas* sp. during  
24 biofilm development. We show that this switch is linked to excretion of extracellular DNA  
25 (eDNA), rather than modification of OM permeability. Confocal laser scanning microscopy  
26 (CLSM) enabled direct visualization of red fluorescent clusters outside intact membranes of viable  
27 cells, suggesting that PI binds eDNA. Besides, the occurrence of PI-positive sub-populations was  
28 correlated with biofilm formation in the model bacterium *Pseudomonas putida* KT2440.  
29 Engineered derivatives thereof with altered biofilm-forming capabilities exposed a whole

1 continuum of phenotypic states involving planktonic cells and aggregates, and were identified  
2 according to the dynamic change of PI-positive cells with flow cytometry analysis. Our results  
3 demonstrate that PI is a fast, convenient and versatile staining for eDNA to rapidly monitor the  
4 phenotypic switching of *Pseudomonas* sp. during transitions in the bacterial lifestyle.

5

## 6 Graphical abstract

7

### Population State

8

9

10

11

12

13

14

15

16

17

18

19

20

21

22

23

24

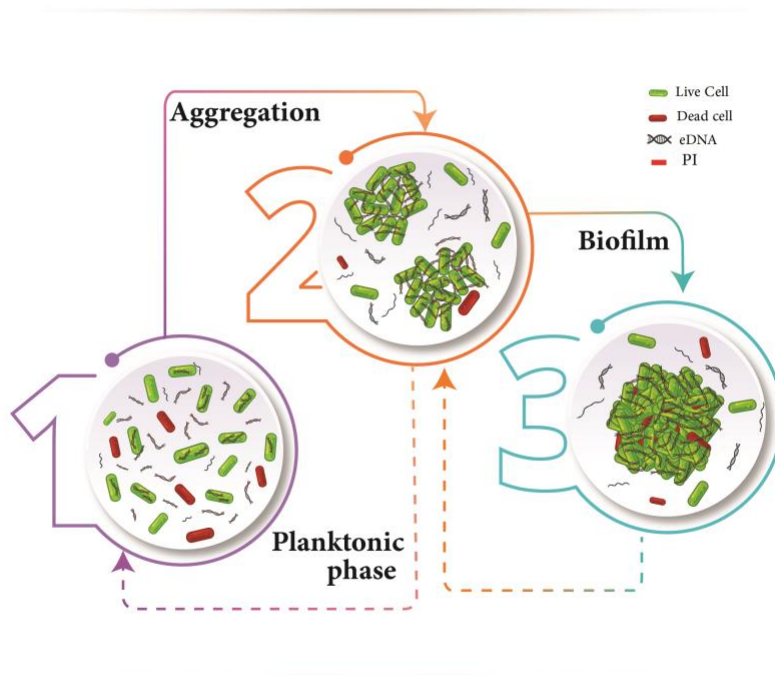

25

**Running title:** Tracking eDNA in *Pseudomonas* phenotypic switch

26

27

**Keywords:** Propidium iodide (PI), Flow cytometry, Extracellular DNA (eDNA), Biofilm,

28

Aggregation, Sub-population, Phenotypic switching

## 1 **Introduction**

2  
3 In natural ecosystems, many bacteria are able to switch between two modes of growth: on the one  
4 hand, a unicellular lifestyle, in which the cells are swimming freely, also called planktonic, and on  
5 the other hand, a multicellular lifestyle, in which the cells are sessile and form biofilms (Berlanga  
6 and Guerrero, 2016). Phenotypic switching between these two states is an important phenomenon  
7 involved in evolutionary development of bacteria and contributing to single-cell, as well as whole  
8 population fitness (Sousa *et al.*, 2011). While bacteria convert to a sessile state, the expression of  
9 several genes is altered causing a phenotype distinguishable from planktonic growing cells (Sousa  
10 *et al.*, 2011). Many microbial processes are dependent on phenotypic switching (e.g., persistence,  
11 utilization of alternative carbon source, competence...), leading to the formation of a  
12 heterogeneous, diverse and dynamic population that can overcome stresses and colonize new  
13 environments (Schreiber *et al.*, 2016)(Ackermann, 2015)(Eldar and Elowitz, 2010)(Delvigne *et al.*,  
14 2014). Biofilm formation is indeed an efficient microbial strategy for survival. Upon switching  
15 from planktonic to biofilm mode of growth, bacteria go through several complex physiological,  
16 metabolic, and phenotypic diversifications (Drenkard, 2003). During biofilm growth, bacteria  
17 adopt a biofilm-specific phenotype, fundamentally different from that expressed in the  
18 corresponding planktonic cells. This switch to the biofilm-specific phenotype can trigger  
19 mechanisms responsible for antimicrobial resistance, enhanced virulence, and persistence (Mah  
20 and O'Toole, 2001). Our understanding of phenotypic switching in the biofilm field is still limited.  
21 However, it is critical to understand how phenotypic switching leads to the formation of biofilms,  
22 the understanding of which has important consequences from both a fundamental (i.e., microbial  
23 physiology) and applied (i.e., bioprocesses) point of view. *Pseudomonas putida* KT2440 is a non-  
24 pathogenic soil bacterium endowed with the ability to adapt to a large variety of physicochemical  
25 and nutritional niches (Benedetti *et al.*, 2016)(Nikel *et al.*, 2014), and able to form biofilms  
26 depending on the environmental conditions (Volke and Nikel, 2018). Biofilm formation is under  
27 control of a complex gene regulatory network (GRN) that orchestrates the phenotypic switching  
28 mechanism (Huang *et al.*, 2019)(Thomas *et al.*, 2014). Due to the complexity of the GRN driving

1 biofilm formation in *P. putida*, it is difficult to rely on a robust, single-cell proxy to characterize  
2 the phenotypic switching involved in the process.

3 Propidium iodide (PI) is widely used for bacterial viability staining; it can only cross compromised  
4 bacterial membranes and is therefore considered an indicator of membrane integrity (Shi *et al.*,  
5 2007). However, recent studies demonstrated that PI might provide false-dead signals entering  
6 viable cells in some bacteria. Rosenberg *et al.* reported that PI staining is not indicative of  
7 membrane integrity in some instances, but rather binds extracellular DNA (eDNA), which is one  
8 of the components of bacterial extracellular polymeric substances (EPS) (Rosenberg *et al.*, 2019).

9 In most cases, the biofilm matrix represents around 90% of the total biofilm biomass and is mainly  
10 composed of polysaccharides, lipids, proteins, and eDNA (Fulaz *et al.*, 2019). The contribution of  
11 eDNA for the biofilm's three-dimensional structure varies significantly among species (Beitelshees  
12 *et al.*, 2018). Over the past few years, a great deal of attention was given to eDNA as one of the  
13 essential components of *Pseudomonas* sp.'s biofilm. In *Pseudomonas aeruginosa*, eDNA was  
14 found to represent a main component of biofilms. eDNA has also been reported to significantly  
15 affect the structural integrity of the biofilm matrix and protect bacterial cells in biofilms from  
16 physical stress, antibiotics, and detergents (Fulaz *et al.*, 2019). Moreover, eDNA can be used as a  
17 source of nutrients for living cells and spread genetic material within the biofilm as well as  
18 planktonic populations (Chimileski *et al.*, 2014)(Brown *et al.*, 2015). In fact, eDNA plays a critical  
19 role in several steps of biofilm formation, including early bacterial attachment, microcolony  
20 formation and aggregation, and in determining the overall biofilm architecture (Qin *et al.*,  
21 2007)(Das *et al.*, 2010)(Whitchurch *et al.*, 2002). Recent reports suggest that the release of eDNA  
22 triggers bacterial surface adhesion by changing electrostatic and hydrophobic interactions between  
23 the bacterium and the surface and promotes early bacterial attachment and aggregation (Das *et al.*,  
24 2010)(Das *et al.*, 2011)(Liu *et al.*, 2008). Another study suggests that differences in the  
25 concentration of eDNA between Gram-negative (e.g. *Pseudomonas aeruginosa* PA14, *Aeromonas*  
26 *hydrophila*, and *Escherichia coli*) and Gram-positive species (e.g. *Staphylococcus aureus*,  
27 *Staphylococcus epidermidis*, and *Enterococcus faecalis*) explains the variations in aggregation and  
28 biofilm formation behavior (Das *et al.*, 2014). Gram-negative bacterial strains displayed significant  
29 drops in aggregation when eDNA was removed through DNase I treatment (Das *et al.*, 2014).

1  
2 In this work, the unique characteristics of eDNA was targeted in order to monitor biofilm switching  
3 dynamics at a single cell level. In particular, by using PI staining, we validated the importance of  
4 eDNA through different population states (i.e., planktonic phase, aggregation, and biofilm) and its  
5 effect on phenotypic diversification. We demonstrate that early biofilm development can be  
6 detected in planktonic cultures according to the degree of aggregation. Moreover, we demonstrate  
7 that PI staining is not associated with modifications in the composition of the OM but depends on  
8 the release of eDNA. The present study provides information on biofilm formation in *P. putida*  
9 KT2440 with both a biofilm-defective mutant ( $\Delta lapA$ ) and biofilm over-producing derivative  
10 (overexpressing a mutated, hyperactive diguanylate cyclase), as well as in a natural isolate i.e.,  
11 *Pseudomonas composti*. By applying a simple staining procedure relying on the use of PI, we were  
12 able to track phenotypic heterogeneity during the switch from planktonic to sessile lifestyle.  
13 Furthermore, we demonstrated that this property can be applied to identify and track biofilm-related  
14 phenotypic switching in a continuous culture system.

15

## 16 **Results and discussion**

17

### 18 **eDNA binds PI and allows for the detection of subpopulations involved in phenotypic** 19 **switching related to biofilm formation**

20

21 In order to investigate the link between a PI-positive subpopulation and eDNA, we performed a  
22 systematic analysis based on flow cytometry (FC) and confocal laser scanning microscopy  
23 (CLSM). Firstly, we conducted a 24-h batch phase mini-bioreactor cultivation of *P. putida*. Biofilm  
24 samples were collected at the end of the fermentation and treated with DNase I to remove eDNA;  
25 the untreated sample was used as control. The samples were stained with PI and analyzed by FC.  
26 In the FC analysis, the microbial population was divided into two subpopulations, according to PI  
27 uptake (PI-positive and PI negative). The PI-negative subpopulation had fluorescence values of  
28 around  $10^3$  arbitrary units. These cells were considered to be unstained and thus having an intact,  
29 not permeable outer membrane. The bacterial subpopulation, which was partially stained and with

1 fluorescence values around  $10^5$  arbitrary units was classified as PI-positive. Flow cytometry  
2 analysis showed a significant difference in the PI-positive sub-population before and after  
3 treatment with DNase. The R1 region identified on the FC profiles corresponds to non-stained cells  
4 that were used as a negative control (Figure 1A). The majority of microbial cells were located in  
5 the R1 region before treated by the DNase enzyme, implied PI can bind with most of them (62.6%)  
6 (Fig. 1B). In contrast, PI-positive sub-populations in biofilm decrease remarkably to 32% after  
7 treating with DNase, which could indicate that cells lose the capacity to bind PI after removing  
8 eDNA (Figure 1C).

9 To further verify the effect of eDNA on PI-positive sub-population, we performed confocal laser  
10 microscopy imaging on planktonic, aggregation, and biofilm samples with double staining (e.g.,  
11 PI and SYTO9, TOTO-1 and SYTO60). Double-stained planktonic cells with PI and SYTO9  
12 showed they were generally co-localized. We noticed green fluorescing cores under red-stained  
13 shells of individual sections and confirmed PI staining not being indicative of membrane integrity  
14 but rather staining of eDNA, which is present outside of intact membrane (Figure 2A and 2B),  
15 except for the most strongly red cells that lacked green signal and were apparently true dead signals.  
16 We visualized the percent of eDNA on aggregation and biofilm samples by combining SYTO60  
17 and TOTO-1 using CLSM to produce high-quality images of eDNA. SYTO60 stains bacterial cell  
18 red, whereas TOTO-1 stains eDNA green (Figure 2C and 2D). We observed a high amount of  
19 eDNA in both samples tested. Moreover, to further prove the role of eDNA in PI-staining, we  
20 visualized DNase treated biofilm samples with CLSM. The results show that PI signals in a non-  
21 treated sample with DNase enzyme are intensively high compare to a sample that has been treated  
22 with DNase (Figure 2E and 2F).

23 Next, we investigated a possible correlation between eDNA and iron concentration and PI-positive  
24 subpopulation in *Pseudomonas* sp. Indeed, iron has been shown to play a critical role in altering  
25 the eDNA production and biofilm formation in diverse bacteria (Yang *et al.*, 2007)(Allesen-Holm  
26 *et al.*, 2006)(Banin *et al.*, 2006)(Binnenkade *et al.*, 2014)(Oh *et al.*, 2018).

27 We have designed a matrix of iron concentrations gradient in a 96-well plate format. The extent of  
28 biofilm formation and quantity of eDNA has been assessed by crystal violet (CV) staining and  
29 fluorescent dye-based quantification, respectively. We found that biofilm formation of

1 *Pseudomonas* decreased with increasing iron concentrations (Figure 3A), which is in accordance  
2 with the previous study (Yang *et al.*, 2007). Moreover, the quantity of eDNA was assessed by using  
3 PicoGreen. The fluorescence intensity was measured immediately after adding the stain. Results  
4 demonstrated that the quantity of eDNA increased by decreasing iron concentration (Figure 3B).

5  
6 In order to verify that the PI staining results are the direct consequence of biofilm formation, we  
7 genetically altered *P. putida* to either decrease or increase biofilm formation. To this end, we  
8 knocked out *lapA*, coding for the initial attachment protein. This strain, in the following called  
9  $\Delta lapA$ , is unable to attach to abiotic surfaces. Therefore, biofilm formation is severely reduced  
10 (Boyd *et al.*, 2014). In order to increase biofilm formation, we transformed *P. putida* with the  
11 plasmid pS638::DGC-244, creating strain DGC. The introduced hyperactive di-guanylate cyclase  
12 increases the concentration of the second messenger cyclic-di-GMP (Christen *et al.*, 2006). The  
13 concentration of this second messenger is a major regulator for biofilm formation i.e., high c-di-  
14 GMP concentrations favor an adhesive lifestyle, while a low c-di-GMP concentration leads to a  
15 planktonic lifestyle (Gjermansen *et al.*, 2006). As the basal expression of the di-guanylate cyclase  
16 led to a substantial increase in biofilm development, we refrained from supplementing the inducer  
17 to minimize the perturbation of the cells.

18 In addition, the percentage of PI positive-subpopulation in the presence of high (100  $\mu\text{M}$ ) and low  
19 (5  $\mu\text{M}$ ) iron ( $\text{Fe}^{3+}$ ) concentration was investigated by FC in all four *Pseudomonas* strains. We have  
20 noticed in all tested strains, except *P. putida*  $\Delta lapA$ , PI-positive subpopulation and biofilm  
21 formation increased as the iron concentration decreased (Figure 3C). Given the association of  
22 eDNA with the biofilm matrix, we assumed a significant difference in the percentage of PI-positive  
23 subpopulation in the presence of high and low iron concentration could be due to a change in the  
24 quantity of eDNA present in the sample. For *P. putida*  $\Delta lapA$ , as a non-biofilm former strain, we  
25 did not notice any change in PI- subpopulation or biofilm formation ability.

26 Considering the above-mentioned outcome, we evaluated the link between the biofilm-forming  
27 capacity and PI-positive sub-population by monitoring dynamic changes of PI-positive sub-  
28 population during biofilm development. Results show a significant difference in PI-positive sub-  
29 population among all tested strains. We observed high PI-positive percentage in DGC and *P.*



1 *composti* by comparison with *P. putida* wild-type and the  $\Delta lapA$  derivative (Figure 4A). In  
2 addition, the PI-positive fraction in all cases was increased upon mid-exponential growth phase  
3 and decreased at the end of the batch phase (Figure 4A), which could be due to the release of eDNA  
4 and in the subsequent increase of aggregation at the beginning of the batch phase and decrease the  
5 amount of small aggregate in planktonic phase by switching to biofilm phase at the end of a phase  
6 (Figure S2). Meanwhile, we have evaluated the biofilm formation ability of all four strains using a  
7 crystal violet microtiter plate assay (Figure 4B). We have shown that DGC, and *P. composti* are  
8 strong biofilm former and produce accordingly more eDNA than the other strains tested.  
9 Hereafter, due to the strong biofilm formation capability of DGC strain, planktonic cells,  
10 aggregates, and biofilm samples of this strain have been collected during the batch phase, and  
11 corresponding PI-positive fraction of samples have been compared. FC analysis indicates a higher  
12 PI-positive percentage (41.8% and 30.8%) in biofilm and aggregation samples, respectively, by  
13 comparison with the planktonic phase (7.5%) (Figure 4C).

#### 14 15 **OM permeability and porin composition are not implied in phenotypic switching related to** 16 **biofilm formation**

17  
18 Previous experiments have pointed out that PI binding could be related to a change in outer  
19 membrane (OM) composition (Sassi *et al.*, 2019). Indeed, it has been shown that particular porin  
20 deletion in *E. coli* can lead to increased OM permeability according to PI staining (Brognaux *et al.*,  
21 2014) (Delvigne *et al.*, 2011)(Brognaux *et al.*, 2013). A systematic analysis of the effects of the  
22 group B porins on the outer membrane permeability of *P. putida* was then performed. Our aim was  
23 to investigate whether PI staining could also be related to modifying the porin composition in  
24 *Pseudomonas* OM. To this end, we constructed the single and multiple deletion mutants for all  
25 genes encoding OprB porins (OprB-I, OprB-II, and OprB-III) and measured the corresponding PI-  
26 positive subpopulation fraction through various time point starting from the late stationary phase.  
27 The proportion of PI-stained cells in the early stationary phase was low (0.2%-2%, data not shown).  
28 We have noticed that only 1-5% subpopulation of cells was stained with PI across all time points,  
29 and that they exhibited the red fluorescence in FC in all of the tested mutants (Figure 5). This result



1 indicates that single, double, and even triple knockouts of the *oprB* genes have no significant effect  
2 on the PI-positive subpopulation and that PI staining is not related to increased OM permeability  
3 for *P. putida*.

#### 4 5 **Cell auto-aggregation is an important step involved in phenotypic switching leading to** 6 **biofilm formation**

7  
8 To investigate the impact of pre-formed aggregates in the planktonic phase on early biofilm  
9 formation, we have monitored aggregation development during the batch phase cultivation for  
10 strains under study. The auto-aggregation properties of four strains *P. putida*, *P. putida*  $\Delta lapA$ , *P.*  
11 *putida* DGC, and *P. composti* were measured over 24 h based on their sedimentation characteristics  
12 (Figure S3). Our results identified three auto-aggregation types, which have defined as follows.  
13 Strongly auto-aggregation (Agg<sup>+</sup>) strain (DGC) showed significantly ( $P < 0.01$ ) higher auto-  
14 aggregation percentages ( $\geq 90\%$ ) and cells clumped together immediately, forming a precipitate  
15 and resulting in a clear solution; non-auto-aggregation (Agg<sup>-</sup>) strain ( $\Delta lapA$ ), which was unable to  
16 auto-aggregate (auto-aggregation percentage  $< 21\%$ ) and produced consistent turbidity; and  
17 moderate Agg $\times$  strains (*P. putida* and *P. composti*) showing auto-aggregation percentages between  
18 20% to 70%, their suspension showing both a precipitate and constant turbidity (Table S1). The  
19 result indicates that the biofilm-forming capability of strains under this study is highly related to  
20 auto-aggregation ability. The strong auto-aggregation strain DGC produces significantly higher  
21 biofilm compare to other tested strains.

22 On the other hand, in the same strains, aggregation in the planktonic phase was much more  
23 noticeable than for the two additional strains, which probably results in higher eDNA in the  
24 planktonic phase. In addition, to study the dynamic of aggregation formation during the batch  
25 phase, samples have been taken every 2 h and analyzed by FC. We have gated aggregation from  
26 the planktonic phase based on FSC and SSC signals. Flow cytometry analysis indicated the  
27 presence of aggregates phenotypic particles with a wide forward scatter distribution, indicative of  
28 variable particle sizes. These were distinguishable from single cells by their significantly bigger  
29 side- and forward- scatter values (Figure 6A). The degree of aggregation was measured for *P.*

1 *putida*, *P. putida*  $\Delta lapA$ , and *P. composti* during the batch phase (Figure 6B). However, in the case  
2 of the DGC strain, the size of the aggregates was too high to be detected by FC. The aggregation  
3 percentage was significantly higher in the natural isolate *P. composti* by comparison with *P. putida*  
4 and *P. putida*  $\Delta lapA$ , which were also producing less biofilm. In *P. putida* and *P. composti*, we  
5 have noticed an increase of aggregation at the beginning of exponential growth, followed by a  
6 decrease upon entry into stationary phase together with the appearance of biofilm on the wall of  
7 the bioreactor. However, this phenomenon is hardly observed for *P. putida*  $\Delta lap$ , in accordance  
8 with a very low cell aggregation.

9  
10 **Monitoring the phenotypic switching dynamics of *Pseudomonas* based on online flow**  
11 **cytometry allow for investigating biofilm lifecycle at a high temporal resolution**

12  
13 As indicated in the previous sections, PI has been identified as a useful biomarker to follow  
14 phenotypic switching from the planktonic phase to sessile life of *P. putida*. Accordingly, automated  
15 FC was then used for tracking this process during continuous culture with feast-to-famine cycles.  
16 This type of nutrient cycle is known to stimulate c-di-GMP synthesis and alter biofilm formation  
17 (Kalia *et al.*, 2013)(Monds *et al.*, 2007)(Gjermansen *et al.*, 2010)(Gjermansen *et al.*, 2005). The  
18 result pointed out that most of the cells are in a planktonic state during the batch phase (first 5 h),  
19 and few cells are in aggregation (< 7%). Expectedly, the percentage of the corresponding PI-  
20 positive subpopulation was low (< 5%), suggesting reduced eDNA release at this stage.

21 Besides these observations, a significant increase of the PI-positive subpopulation was observed  
22 after several feast to famine cycles. A gradual formation of a dense biofilm layer on the bioreactor  
23 wall was observed accordingly (Figure 7A and 7C). Intriguingly, the FC results show that the  
24 percentage of aggregation in the planktonic phase is fluctuating i.e., it rises during the first 20 h of  
25 continuous culture and then decreases. This non-monotonic behavior can be attributed to the  
26 accumulation of cells in the biofilm matrix during the first phase, making them impossible to detect  
27 by online FC. During the second stage, cells are released from the biofilm and can again be detected  
28 by FC (Figure 7B). The biofilm lifecycle can then be quantified at a very high time resolution based  
29 on this experimental set-up.

1  
2  
3  
4  
5  
6  
7  
8  
9  
10  
11  
12  
13  
14  
15  
16  
17  
18  
19  
20  
21  
22  
23  
24  
25  
26  
27  
28  
29

## Discussion

Studies about phenotypic diversification of microbial populations attract a lot of attention because of the possible new functionalities exhibiting diversified populations. A switch between planktonic and sessile growth is believed to result in a phenotypic change in bacteria. Several bacterial species benefit from phenotypic switching, which is used to generate population diversity, increase bacterial fitness, and adapt to fluctuating environments (Sousa *et al.*, 2011).

Biofilm development in *P. putida* undergoes various structural and metabolic changes that are tightly controlled through a complex GRN, including phenotypic switch. The current state of knowledge in biofilm development in *P. putida* has been limited to the systematic use of confocal microscopy on *P. putida* biofilms grown in flow cells or various strategies to classify and characterize genes involved in each stage of biofilm development (Fazli *et al.*, 2014)(Klausen *et al.*, 2006). Despite the growing understanding of the biofilm cycle's structural and mechanistic details, little is known of the phenotypic switch during biofilm development in *P. putida*. As a result of the complexity of the GRN governing biofilm formation in *P. putida*, it is relatively challenging to depend on a robust single cell proxy to describe the phenotypic switching that takes place in this process. In the present work, we have identified PI as a useful biomarker to follow the cells switching from the planktonic phase to sessile life of *P. putida*. Our result from FC and CSLM indicates PI can bind to the eDNA present in a particular growth phase. The presence of eDNA, which is actively released through delegated cells, has gained significant interest (Okshevsky *et al.*, 2015). Recent studies showed PI could significantly overestimate dead cell counts in the presence of eDNA (Rosenberg *et al.*, 2019). Gião and Keevil noticed that co-staining of *Listeria monocytogenes* biofilms in tap water with PI and SYTO9 gives a false red signal, which is not an indication of dead cells. Still, this phenomenon it is due to the presence of eDNA (Gião and Keevil, 2014). Gallo also noted a similar picture staining the biofilm cells of *Salmonella typhimurium* strain carrying the reporter  $P_{csgBA}::gfp$  with PI. They confirmed green cells were surrounded by a red corona, demonstrating that eDNA was localized around live cells (Gallo *et al.*, 2015). CLSM results look similar to what had been previously shown by Vilain and colleagues for *Bacillus cereus*

1 biofilm on glass wool. They indicated that nucleic acid was linked with the cell exterior, where PI  
2 had free access (Vilain *et al.*, 2009).

3 We have shown that modifying the amount of eDNA by considering different iron concentrations  
4 directly affects PI-positive sub-population. Iron has been demonstrated to be essential in the  
5 modulation of eDNA production, for instance, by triggering prophage induction in *Shewanella*  
6 *oneidensis* (Binnenkade *et al.*, 2014), mediating cell lysis during biofilm formation in  
7 *Streptococcus pneumoniae* (Trappetti *et al.*, 2011), or, in the case of *P. aeruginosa*, regulating  
8 eDNA production in response to both the *pqs* quorum-sensing system and changes in the external  
9 iron concentration (Allesen-Holm *et al.*, 2006)(Yang *et al.*, 2007). Our findings are in line with  
10 studies that showed how high concentrations of iron suppress *P. aeruginosa* biofilm formation in  
11 both microtitre plate cultivations and flow-chamber systems (Musk *et al.*, 2005). Simultaneously,  
12 low iron concentrations were reported to be necessary for *P. aeruginosa* biofilm (microcolony)  
13 formation in an artificial sputum medium (Sriramulu *et al.*, 2005). In *Campylobacter jejuni*, iron  
14 supplementation increased the accumulation of total reactive oxygen species (ROS) and the  
15 production of eDNA and extracellular polysaccharides, which leads to stimulating biofilms  
16 formation (Oh *et al.*, 2018).

17 Additionally, we observed that PI-positive sub-populations increase by manipulating the biofilm  
18 formation ability of *Pseudomonas* sp. In light of eDNA interfering with viability staining, we  
19 assume that the higher presence of eDNA leads to higher PI-positive fractions in strains producing  
20 more biofilm. We have also shown that the percentage of PI-positive fraction is more elevated in  
21 biofilm and aggregation samples as compared to planktonic cells. Since the quantity of eDNA is  
22 higher in the aggregation and biofilm sample, the observed difference could arise due to the binding  
23 between eDNA and PI.

24 In traditional bacterial biofilm development models, biofilm is generally assumed to originate from  
25 individual cells seeded on a surface. However, many biofilm-forming bacteria tend to aggregate in  
26 the planktonic phase; therefore, there is a chance that many natural and infective biofilms may be  
27 rising entirely or partially from pre-formed cell aggregates. Yet how these aggregates influence  
28 biofilm initiation and development is not clear. Given the affinity of many bacteria to aggregate  
29 and the common observation of aggregates in various environmental situations(Burmølle *et al.*,

1 2010)(Monier and Lindow, 2003)(Stoodley *et al.*, 2002) , it seems likely that natural biofilms are  
2 often initiated from pre-formed aggregates. *P. aeruginosa*, upon growth in liquid culture, forms  
3 large aggregates containing massively packed viable cells and eDNA(Schleheck *et al.*, 2009). For  
4 marine biofilms, the increased adhesiveness and surface conditioning of planktonic multicellular  
5 aggregates have been shown to accelerate bacterial attachment to a surface in early biofilm  
6 initiation (Bar-Zeev *et al.*, 2012) . Similarly, for *P. aeruginosa*, an increased affinity toward  
7 aggregation, probably an alternative for greater stickiness, has also been associated with increased  
8 biofilm formation (Häußler *et al.*, 2003)(Déziel *et al.*, 2001). We have shown that it is possible to  
9 detect early biofilm formation in the planktonic phase by determining the degree of aggregation by  
10 FC. Our result shows auto-aggregation ability of *Pseudomonas* sp. was highly correlated to their  
11 biofilm formation ability.

12 Previous observations made in *E. coli* by using mutants of the KEIO library have been confirmed  
13 that porin suppression increases the occurrence of a partially PI-stained phenotype (Sassi *et al.*,  
14 2019). Although the mechanisms behind this increase in OM permeability are unknown,  
15 modifications in outer membrane porins composition have been hypothesized since porin removal  
16 has been shown to up and down-regulate other porins expression (Yang *et al.*, 2011). Recently, it  
17 has been demonstrated that *E. coli* is capable of modifying the porin composition to adapt its OM  
18 permeability under nutrient limitation. Thus, *E. coli* differentiates into two subpopulations  
19 displaying individual phenotypic features (non-permeabilized and permeabilized cells) during  
20 glucose limitation (Sassi *et al.*, 2019). In the case of *P. putida*, porins organization and regulation  
21 have been far less characterized. When compared with *E. coli*, the porins of strain KT2440 are  
22 organized in different gene and functional clusters, including membrane stabilization, transport of  
23 specific substrates, cell structure determination, and pore formation (Hancock and Brinkman, 2002).  
24 Among them, OprB has been more thoroughly explored and shows high homology with OprB from  
25 *P. aeruginosa*, which has been suggested to be involved in glucose uptake (Raneri *et al.*, 2018).  
26 However, our results have shown that PI staining in *Pseudomonas* sp. is not associated with the  
27 modification of OM composition but is more likely depending on the release of eDNA.

28 It is known that nutrient conditions affect bacterial populations' transition between planktonic state  
29 or free-floating aggregates and surface-attached biofilms (Schleheck *et al.*, 2009)(McDougald *et*

1 *al.*, 2012)(Paananen *et al.*, 2003)(Gjermansen *et al.*, 2010). In this work, we have used automated  
2 FC for tracking the dynamics of the PI-positive subpopulation of *P. putida* upon exposure to  
3 successive feast-to-famine cycles. Such cycling conditions promoted phenotypic switching  
4 between planktonic cells, aggregates, and biofilm cells. The dynamic data acquired in this work  
5 allows for tracking phenotypic switching based on PI staining, taking to account switching to a  
6 stress condition effect the release of eDNA and biofilm formation (Ibáñez de Aldecoa *et al.*,  
7 2017)(Lysis, 2018). Increasing the PI-positive sub-population also increased biofilm cells  
8 appearance on the wall of bioreactor. FC results show online profiling of aggregates during  
9 cultivation time, which helps us to monitor the phenotypic switch better. Taken together, the data  
10 gathered in this work point out that the combination of online FC, continuous cultivation system  
11 and appropriate single-cell proxy provides the user with the overall snapshot of phenotypic change  
12 during the biofilm formation process. Further investigation would be required in order to fully  
13 understand the mechanisms behind this phenotypic switch, for which our present method can be  
14 further expanded and used to this end.

15

## 16 **Conclusion**

17

18 In the present study, PI was shown to be able bind with the viable cells from different phenotypes  
19 of *Pseudomonas* sp. We have demonstrated that the ubiquity of eDNA made it an ideal target for  
20 monitoring phenotypic switching of *Pseudomonas* in the biofilm development process by a simple  
21 staining procedure with PI. Hence, this study opens novel avenues to possible applications of PI as  
22 a single-cell proxy allowing us to capture the "key" subpopulation of cells involved in biofilm  
23 formation. In this sense, this work paves the way to further understand the phenotypic  
24 diversification mechanism involved in biofilm formation. This body of knowledge can be exploited  
25 to control phenotypic switch during transition between planktonic, aggregates, and biofilm states  
26 and subsequently control biofilm formation, e.g., in bioprocesses relying on 'catalytic' biofilms.

27

## 28 **Methods**

29

## 1 **Strains and medium composition**

2 Bacterial strains used in this study are listed in Table 1. All strains were maintained in 25% (v/v)  
3 glycerol at  $-80^{\circ}\text{C}$  in working seed vials (2 mL). Prior to experiments, one colony of each bacterium  
4 was used to inoculate 10 mL of lysogeny broth (LB) medium (10 g  $\text{L}^{-1}$  NaCl, 5 g  $\text{L}^{-1}$  yeast extract,  
5 and 12 g  $\text{L}^{-1}$  tryptone) and grown for 6 h with shaking at  $30^{\circ}\text{C}$ . Precultures and cultures of all  
6 bacteria were done in M9 minimal medium (33.7 mM  $\text{Na}_2\text{HPO}_4$ , 22.0 mM  $\text{KH}_2\text{PO}_4$ , 8.55 mM  
7 NaCl, 9.35 mM  $\text{NH}_4\text{Cl}$ , 1 mM  $\text{MgSO}_4$ , and 0.3 mM  $\text{CaCl}_2$ ), complemented with a trace elements  
8 (13.4 mM EDTA, 3.1 mM  $\text{FeCl}_3 \cdot 6\text{H}_2\text{O}$ , 0.62 mM  $\text{ZnCl}_2$ , 76  $\mu\text{M}$   $\text{CuCl}_2 \cdot 2\text{H}_2\text{O}$ , 42  $\mu\text{M}$   $\text{CoCl}_2 \cdot 2\text{H}_2\text{O}$ ,  
9 162  $\mu\text{M}$   $\text{H}_3\text{BO}_3$ , and 8.1  $\mu\text{M}$   $\text{MnCl}_2 \cdot 4\text{H}_2\text{O}$ ), 1  $\mu\text{g}$   $\text{L}^{-1}$  biotin and 1  $\mu\text{g}$   $\text{L}^{-1}$  thiamin) and supplemented  
10 with glucose (5 g  $\text{L}^{-1}$ ) as the main carbon source (pH = 7.2). For iron-dependent experiments, a  
11 concentrated  $\text{FeCl}_3$  solution was added to the media to give the final ferric iron concentrations  
12 described in the text. For strain DGC, the media was supplemented with gentamycin at a final  
13 concentration of 10  $\mu\text{g}$   $\text{ml}^{-1}$ .

14

## 15 **Plasmid construction and genetic manipulations**

16 Plasmid pS638::DGC was constructed by amplifying the hyperactive diguanylate cyclase mutant  
17 A0244 from *Caulobacter crescentus* (Christen *et al.*, 2006), with the primer pair P1 and P2. The  
18 resulting amplicon and vector pSEVA638 were digested with *Bam*HI and *Sac*I (FD0054 and  
19 FD1133, Thermo Fisher Scientific). The fragments were purified (NucleoSpin Gel and PCR  
20 Clean-up Columns, Macherey Nagel) and ligated with T4 DNA ligase (EL0014, Thermo Fisher  
21 Scientific). *E. coli* DH5 $\alpha$  was transformed with the ligation mixture and the cell suspension was  
22 plated on a gentamycin-selective plate. Subsequently, the constructed pS638::DGC (where  
23 *DGCA*<sup>0244</sup> was placed under transcriptional control of the inducible *XylS/Pm* expression system)  
24 plasmid was isolated from a single colony and its correctness was confirmed by sequencing. All  
25 the plasmids are listed in Table 2.

26

27 The plasmids for deletion of *lapA* and the porins *oprB-I*, *oprB-II* and *oprB-III* were constructed  
28 according to (Wirth *et al.*, 2020b). In short, ~500 bp homology arms (HA) flanking the gene coding  
29 sequences were amplified from chromosomal DNA of *P. putida* KT2440 using the primer pairs



1 P3/P4 (*lapA\_HA1*), P5/P6 (*lapA\_HA1*), P7/P8 (*oprB-I\_HA1*), P9/P10 (*oprB-I\_HA2*), P11/P12  
2 (*oprB-II\_HA1*), P13/P14 (*oprB-II\_HA2*), P15/P16 (*oprB-III\_HA1*) and P17/P18 (*oprB-III\_HA2*),  
3 and assembled into the suicide vector pSNW2 employing the USER cloning method (Cavaleiro *et*  
4 *al.*, 2015). The purified plasmids were introduced into stationary *P. putida* KT2440 cells by  
5 electroporation and selected on LB agar medium supplemented with kanamycin (50  $\mu\text{g mL}^{-1}$ ). The  
6 corresponding pSNW2 derivative, now fully integrated into the bacterial chromosome, was  
7 resolved by transforming the cells with the auxiliary plasmid pQURE6 and selection on gentamicin  
8 (10  $\mu\text{g mL}^{-1}$ ) and 3-methylbenzoate (1 mM) (Volke *et al.*, 2020). Resolved strains (GFP-negative  
9 and kanamycin-sensitive) were tested for the desired genotype by colony PCR (OneTaq® 2X  
10 Master Mix with Standard Buffer, New England Biolabs).

11

## 12 **Mini-bioreactor cultivations**

13 A bioreactor system from 2MAG© block, equipped with eight positions for fermentation vessels  
14 of 16 mL total volume and a working volume of 12-mL bioreactors, was used in these experiments.  
15 The bioreactor block is equipped with a magnetic inductive drive with two independent heat  
16 exchangers integrated into the bioreactor block, one for temperature control for the reaction mixture  
17 and the second to control the headspace's cooling of the bioreactors to prevent evaporation. The  
18 system is also equipped with fluorometric sensor spots for pH and dissolved oxygen (DO)  
19 positioned at the bottom of each reactor (MiniReaktor HTBD, Presens, Regensburg, Germany).  
20 We performed 24-h batch phase fermentations in order to test quickly and screen on PI-positive  
21 dynamic of strains under study, up to 6 replicates simultaneously. Samples have been taken every  
22 1-2 h and immediately analyzed by FC.

23

## 24 **Sample preparation**

25 Adherent cells were harvested by scraping from the wall of the bioreactor vessel with a cell scraper  
26 and resuspended in PBS. In the case of aggregation, 5 mL culture was aliquoted into a 15-mL  
27 Falcon tube, and aggregates were allowed to sediment for 10 min. Then, aggregates were carefully  
28 picked up from the bottom of the tube by using sterile cut pipette tips, and transferred into 1.5-mL  
29 Eppendorf tubes. A quick spin at 1,400 rpm was applied for 15 s, and the supernatant was removed.

1 Both aggregates and biofilm samples were resuspended in sterile PBS and vortexed for 30 s. Before  
2 FC analysis, samples were gently sonicated (2× for 12 s, with 25% amplitude) to disperse clumps  
3 into single cells without causing cell lysis. A planktonic sample has been filtered through a sterile  
4 syringe filter (5 µm) to eliminate aggregates before FC analysis.

## 6 **Bacteria staining protocols**

7 The four fluorescent stains used in this study were: (i) PI (P4170, Sigma-Aldrich); a stock solution  
8 was prepared at 1 mg mL<sup>-1</sup> in sterile Milli-Q water and used at a final concentration of 1.5 µM in  
9 sterilized PBS; (ii) TOTO<sup>TM</sup>-1 iodide (T3600, Invitrogen<sup>TM</sup> Thermo Fisher Scientific); a stock  
10 solution was prepared in DMSO (at 1 mM) and used at a final concentration of 2 µM in sterilized  
11 PBS; (iii) SYTO<sup>TM</sup>9 (S34854, Invitrogen<sup>TM</sup> Thermo Fisher Scientific); a stock solution was  
12 prepared in DMSO at 5 mM and used at a final concentration of 5 µM in sterilized PBS; and (iv)  
13 SYTO<sup>TM</sup>60 (S11342, Invitrogen<sup>TM</sup> Thermo Fisher Scientific); a stock solution was prepared in  
14 DMSO at 5 mM and used at a final concentration of 10 µM in sterilized PBS. All bacterial samples  
15 were stained right before FC analysis by adding 1 µL of the PI stock solution to 1 mL of a cell  
16 suspension in PBS (1×10<sup>7</sup> cells mL<sup>-1</sup>). The stained samples were incubated for 10 min in the dark  
17 at room temperature and analyzed by FC (live-dead gating was done based on heat-killed bacteria  
18 at 80°C for 1 h).

## 20 **Flow cytometry**

21 FC analysis of PI-stained bacteria was carried out using BD Accuri<sup>TM</sup> C6 device (BD Biosciences).  
22 Cell counts, red fluorescence (FL3), and Forward scatter (FSC) values were determined with FC.  
23 The software settings were as following: Fluidics, medium; Threshold, 20,000 on FSC-H; Run with  
24 limits, 10,000 events. Gating of dead and alive signal populations was executed on Propidium  
25 iodide (FL3-A; 670 nm LP) scatter plot. FC analysis of PI staining bacteria was carried out on  
26 planktonic, aggregation, and biofilm samples. Cells were diluted to an appropriate density with  
27 filtered 1x phosphate-buffered saline (1× PBS; 8 g L<sup>-1</sup> NaCl, 0.2 g L<sup>-1</sup> KCl, 1.4 g L<sup>-1</sup> Na<sub>2</sub>HPO<sub>4</sub>, and  
28 0.2 g L<sup>-1</sup> KH<sub>2</sub>PO<sub>4</sub>, pH 7.2) stained with PI and analyzed by flow cytometry. Online flow cytometry  
29 platform (Accuri C6 BD Biosciences San Jose CA USA) has been used in combination with a

1 pulsed continuous cultivation system. The platform has been described in detail in a previous study  
2 (Sassi *et al.*, 2019). Briefly, sample processing following multiple steps, including sample  
3 acquisition and online staining, dilution threshold, and online FC analysis. Flow cytometry data  
4 were exported as an FCS file and processed by a custom Python script version (0.5.0).

#### 6 **DNase enzyme Treatment**

7 Biofilm cells were prepared according to the protocol mentioned above. Then, the number of cells  
8 in the sample was adjusted to ( $1 \times 10^7$  cells  $\text{mL}^{-1}$ ), and samples were resuspended in 500  $\mu\text{L}$  of  $1 \times$   
9 DNase I buffer (10 mM Tris·HCl, pH = 7.5, 2.5 mM  $\text{MgCl}_2$ , and 0.1 mM  $\text{CaCl}_2$ ) with or without  
10 DNase I (final concentration 160 U  $\text{mL}^{-1}$ , Roche, cat. # 04716728001) and were incubated at  $37^\circ\text{C}$   
11 for 3 h. After incubation, samples were pelleted by centrifugation at 8500 rpm for 10 min,  
12 resuspended in PBS, stained by PI, and analyzed by FCM.

#### 14 **Confocal laser scanning microscopy (CLSM)**

15 All samples were analyzed by confocal laser-scanning microscope (LSM) LSM880 Airyscan  
16 super-resolution system (Carl Zeiss, Oberkochen, Germany). The images were taken with the Plan-  
17 Aplanachromat 63 $\times$ /1.4 Oil objective. We used an excitation wavelength of 488 nm and emission at  
18 500-550 nm for green fluorescence, and an excitation wavelength of 561 nm and emission at 580-  
19 615 nm for red fluorescence. Images were acquired continuously at a pixel resolution of 0.04  $\mu\text{m}$   
20 (regular Airyscan mode) in XY and 1- $\mu\text{m}$  interval in Z step-size using the piezo drive. Before  
21 CLSM analysis, staining was performed with one or more fluorescent dyes in the following  
22 combinations: PI, SYTO9+PI, and TOTO1+SYTO60. An aliquot of 10-15  $\mu\text{L}$  of 1:1 stain mixture  
23 solution has been added to a sample of planktonic, aggregate, and biofilm and incubated under  
24 exclusion of light (10 min for PI, SYTO9+PI, and 20 min for TOTO1+SYTO60).

#### 26 **Auto-aggregation assay**

27 Auto-aggregation tests were adapted from the protocol published by Kos *et al.* (Kos *et al.*, 2003).  
28 For the auto-aggregation assay, the strains studied were first grown in M9 minimal medium for 18  
29 h. After centrifugation (10,000 rpm, 10 min), pellets of cells were resuspended, washed twice with

1  $1 \times$  PBS, and finally resuspended to  $1 \times 10^8$  CFU mL<sup>-1</sup> in the same medium. Then, suspensions were  
2 vortexed and incubated at room temperature for 15 h. Samples were harvested during different  
3 times along the incubation experiment (0, 1, 5, 9, and 15 h). Each time, a 1-mL aliquot from the  
4 top of the suspensions was carefully removed and its absorbance ( $A$ ) was read at 600 nm in a  
5 spectrophotometer. Auto-aggregation was calculated using the following formula:

6

$$7 \quad \text{Auto-aggregation (\%)} = [(A_0 - A_t)/A_0] \times 100$$

8

9 where  $A_0$  indicates the absorbance at time 0 h and  $A_t$  indicates the absorbance every hour, up to 15  
10 h.

11

## 12 **Quantification of biofilm growth and eDNA in biofilms in 96-well plates**

13 Two-day biofilm formation of *Pseudomonas* strains was determined by crystal violet staining using  
14 a 96-well plate lid with pegs extending into each well (Nunc-TSP lid, Invitrogen™ Thermo Fisher  
15 Scientific). Briefly, precultures were grown overnight at 30°C to an OD<sub>600 nm</sub> of 1.0. The cell  
16 suspensions were then adjusted to an OD<sub>600 nm</sub> of 0.1 in M9 medium. A total of 160 μL cell  
17 suspension were added to each well. Fresh medium was used as negative control. The plates were  
18 sealed with parafilm and incubated with shaking at 180 rpm at 30°C. The biofilm biomass was  
19 quantified with a crystal violet staining assay modified from previously reported CV assays (Ren  
20 *et al.*, 2014). CV quantification was performed on the pegs of the Nunc-TSP lid culture system.  
21 Briefly, after 48 h of cultivation, the peg lids were taken out and washed three times using PBS.  
22 Subsequently, the peg lids were placed in plates with 180 μL of an aqueous 1% (w/v) CV solution.  
23 Then, the lids were washed with PBS three times after staining for 20 min. Subsequently, the peg  
24 lids with crystal violet stain were placed into a new microtiter plate with 200 μL of 33% (w/v)  
25 glacial acetic acid in each well for 15 min. The optical density at 590 nm of each sample was  
26 measured by a microplate reader (Tecan SPARK, Männedorf, Switzerland). The quantity of eDNA  
27 associated with *Pseudomonas* biofilm was examined in 96-well black plates (Cell culture  
28 microplate, μCLEAR®) in triplicates parallel with the biofilm quantification. The 2-day biofilm  
29 culture was rinsed three times with sterile distilled water. eDNA was quantified by QuantiFluor

1 dsDNA dye (QuantiFluor dsDNA System, Promega, Madison, WI, USA) according to  
2 manufacturer's protocol. Briefly, eDNA in each sample was mixed with 200  $\mu$ L of freshly prepared  
3 QuantiFluor dsDNA dye in TE buffer. Wells with QuantiFluor dsDNA dye were incubated for 5  
4 min before measuring the fluorescence intensity (excitation wavelength = 504 nm and emission  
5 wavelength = 531 nm) using a Tecan microplate reader. Lambda DNA (Invitrogen<sup>TM</sup> Molecular  
6 Probes) was used to generate a calibration curve for each run.

7

### 8 **Pulsed continuous cultivation with online flow cytometry**

9 *P. putida* KT2440 was cultivated in a stirred bioreactor (Biostat B-Twin, Sartorius) in continuous  
10 mode with glucose feed pulses (0.5 g L<sup>-1</sup> per pulse) at a frequency of one pulse per hour. Data  
11 acquisition was performed every 12 min *via* a coupled, online FC analysis. A 1-L volume of M9  
12 minimal medium (containing 5 g L<sup>-1</sup> glucose) was inoculated by overnight preculture (OD<sub>600</sub> = 0.3)  
13 in the 2-L capacity bioreactor. The pH and temperature were maintained at 7.2 and 30°C,  
14 respectively. Stirring was set at 800 rpm and aeration flow rate to 1 L min<sup>-1</sup> (1 vvm). The drop in  
15 DO marked the depletion of oxygen and the start of continuous cultivation mode. M9 minimal  
16 medium was fed without carbon source into the bioreactor at a dilution rate  $D = 0.1$  h<sup>-1</sup>. After 1 h,  
17 a pulse of glucose was injected in order to increase the concentration as fast as possible (within 30  
18 s) to a global glucose concentration of 0.5 g L<sup>-1</sup>. The microbial population was tracked by an online  
19 flow cytometry device as previously described (Nguyen *et al.*, 2021)(Sassi *et al.*, 2019). Briefly, a  
20 0.8-mL sample was taken from the bioreactor each 12 min, automatically diluted and stained with  
21 PI, and then automatically injected into an Accuri C6 FC for detection. Before processing, the  
22 independent .fcs files obtained through online FC were compacted in a dataframe (.pkl file  
23 extension) based on the Pandas package (<https://pandas.pydata.org/>) from Python. This file was  
24 used for generating the plots with the evolution of PI-positive and aggregates subpopulations, as  
25 well as for generating individual dotplots with forward scatter (FSC) as  $x$ -axis and PI fluorescence  
26 as  $y$ -axis. These dotplots were further assembled into a single .avi movie file based on the ImageJ  
27 software (Rueden *et al.*, 2017) shown as Supplemental material (Movies S1). Raw .fcs data were  
28 deposited on FlowRepository and can be accessed by following the link:

1 <https://flowrepository.org/id/RvFrYohjOYhgmxWvC6PUFdME2OZX5BGPNYvVLJkpEa1NHzwVN5sllGgBYFgsRyHp>

## 4 References

- 5  
6 Ackermann, M. (2015) A functional perspective on phenotypic heterogeneity in microorganisms. *Nat Rev Microbiol* **13**: 497–508.
- 7  
8 Allesen-Holm, M., Barken, K.B., Yang, L., Klausen, M., Webb, J.S., Kjelleberg, S., et al. (2006)  
9 A characterization of DNA release in *Pseudomonas aeruginosa* cultures and biofilms. *Mol*  
10 *Microbiol* **59**: 1114–1128.
- 11 Bagdasarian, M., Lurz, R., Rückert, B., Franklin, F.C.H., Bagdasarian, M.M., Frey, J., and  
12 Timmis, K.N. (1981) Specific-purpose plasmid cloning vectors II. Broad host range, high  
13 copy number, RSF 1010-derived vectors, and a host-vector system for gene cloning in  
14 *Pseudomonas*. *Gene* **16**: 237–247.
- 15 Banin, E., Brady, K.M., and Greenberg, E.P. (2006) Chelator-induced dispersal and killing of  
16 *Pseudomonas aeruginosa* cells in a biofilm. *Appl Environ Microbiol* **72**: 2064–2069.
- 17 Bar-Zeev, E., Berman-Frank, I., Girshevitz, O., and Berman, T. (2012) Revised paradigm of  
18 aquatic biofilm formation facilitated by microgel transparent exopolymer particles. *Proc*  
19 *Natl Acad Sci U S A* **109**: 9119–9124.
- 20 Beitelshes, M., Hill, A., Jones, C.H., and Pfeifer, B.A. (2018) Phenotypic variation during  
21 biofilm formation: Implications for anti-biofilm therapeutic design. *Materials (Basel)* **11**: 1–  
22 18.
- 23 Benedetti, I., de Lorenzo, V., and Nikel, P.I. (2016) Genetic programming of catalytic  
24 *Pseudomonas putida* biofilms for boosting biodegradation of haloalkanes. *Metab Eng* **33**:  
25 109–118.
- 26 Berlanga, M. and Guerrero, R. (2016) Living together in biofilms: The microbial cell factory and  
27 its biotechnological implications. *Microb Cell Fact* **15**: 1–11.
- 28 Binnenkade, L., Teichmann, L., and Thormanna, K.M. (2014) Iron triggers  $\lambda$ So prophage  
29 induction and release of extracellular DNA in *Shewanella oneidensis* MR-1 biofilms. *Appl*  
30 *Environ Microbiol* **80**: 5304–5316.
- 31 Boyd, C.D., Jarrod Smith, T., El-Kirat-Chatel, S., Newell, P.D., Dufrêne, Y.F., and O’Toole, A.  
32 G.A. (2014) Structural features of the *Pseudomonas fluorescens* biofilm adhesin LapA  
33 required for LapG-dependent cleavage, biofilm formation, and cell surface localization. *J*  
34 *Bacteriol* **196**: 2775–2788.
- 35 Brognaux, A., Bugge, J., Schwartz, F.H., Thonart, P., Telek, S., and Delvigne, F. (2013) Real-  
36 time monitoring of cell viability and cell density on the basis of a three dimensional optical  
37 reflectance method (3D-ORM): Investigation of the effect of sub-lethal and lethal injuries. *J*  
38 *Ind Microbiol Biotechnol* **40**: 679–686.
- 39 Brognaux, A., Francis, F., Twizere, J.C., Thonart, P., and Delvigne, F. (2014) Scale-down effect  
40 on the extracellular proteome of *Escherichia coli*: Correlation with membrane permeability  
41 and modulation according to substrate heterogeneities. *Bioprocess Biosyst Eng* **37**: 1469–  
42 1485.
- 43 Brown, H.L., Reuter, M., Hanman, K., Betts, R.P., and Van Vliet, A.H.M. (2015) Prevention of  
44 biofilm formation and removal of existing biofilms by extracellular dnases of *Campylobacter*  
45 *jejuni*. *PLoS One* **10**: 1–21.
- 46 Burmølle, M., Thomsen, T.R., Fazli, M., Dige, I., Christensen, L., Homøe, P., et al. (2010)  
47 Biofilms in chronic infections - A matter of opportunity - Monospecies biofilms in  
48 multispecies infections. *FEMS Immunol Med Microbiol* **59**: 324–336.
- 49 Cavaleiro, A.M., Kim, S.H., Seppälä, S., Nielsen, M.T., and Nørholm, M.H.H. (2015) Accurate  
50 DNA Assembly and Genome Engineering with Optimized Uracil Excision Cloning. *ACS*



- 1       *Synth Biol* **4**: 1042–1046.
- 2 Chimileski, S., Franklin, M.J., and Papke, R.T. (2014) Biofilms formed by the archaeon  
3 *Haloferax volcanii* exhibit cellular differentiation and social motility, and facilitate  
4 horizontal gene transfer. *BMC Biol* **12**:
- 5 Christen, B., Christen, M., Paul, R., Schmid, F., Folcher, M., Jenoe, P., et al. (2006) Allosteric  
6 Control of Cyclic di-GMP Signaling. *J Biol Chem* **281**: 32015–32024.
- 7 Das, T., Krom, B.P., Van Der Mei, H.C., Busscher, H.J., and Sharma, P.K. (2011) DNA-  
8 mediated bacterial aggregation is dictated by acid-base interactions. *Soft Matter* **7**: 2927–  
9 2935.
- 10 Das, T., Sehar, S., Koop, L., Wong, Y.K., Ahmed, S., Siddiqui, K.S., and Manefield, M. (2014)  
11 Influence of calcium in extracellular DNA mediated bacterial aggregation and biofilm  
12 formation. *PLoS One* **9**: 1–11.
- 13 Das, T., Sharma, P.K., Busscher, H.J., Van Der Mei, H.C., and Krom, B.P. (2010) Role of  
14 extracellular DNA in initial bacterial adhesion and surface aggregation. *Appl Environ*  
15 *Microbiol* **76**: 3405–3408.
- 16 Delvigne, F., Brognaux, A., Francis, F., Twizere, J.C., Gorret, N., Sorensen, S.J., and Thonart, P.  
17 (2011) Green fluorescent protein (GFP) leakage from microbial biosensors provides useful  
18 information for the evaluation of the scale-down effect. *Biotechnol J* **6**: 968–978.
- 19 Delvigne, F., Zune, Q., Lara, A.R., Al-Soud, W., and Sørensen, S.J. (2014) Metabolic variability  
20 in bioprocessing: Implications of microbial phenotypic heterogeneity. *Trends Biotechnol* **32**:  
21 608–616.
- 22 Déziel, E., Comeau, Y., and Villemur, R. (2001) Initiation of biofilm formation by *Pseudomonas*  
23 *aeruginosa* 57RP correlates with emergence of hyperpiliated and highly adherent phenotypic  
24 variants deficient in swimming, swarming, and twitching motilities. *J Bacteriol* **183**: 1195–  
25 1204.
- 26 Drenkard, E. (2003) Antimicrobial resistance of *Pseudomonas aeruginosa* biofilms. *Microbes*  
27 *Infect* **5**: 1213–1219.
- 28 Eldar, A. and Elowitz, M.B. (2010) Functional roles for noise in genetic circuits. *Nature* **467**:  
29 167–173.
- 30 Fazli, M., Almlblad, H., Rybtke, M.L., Givskov, M., Eberl, L., and Tolker-Nielsen, T. (2014)  
31 Regulation of biofilm formation in *Pseudomonas* and *Burkholderia* species. *Environ*  
32 *Microbiol* **16**: 1961–1981.
- 33 Fulaz, S., Vitale, S., Quinn, L., and Casey, E. (2019) Nanoparticle–Biofilm Interactions: The  
34 Role of the EPS Matrix. *Trends Microbiol* **27**: 915–926.
- 35 Gallo, P.M., Rapsinski, G.J., Wilson, R.P., Oppong, G.O., Sriram, U., Goulian, M., et al. (2015)  
36 Amyloid-DNA Composites of Bacterial Biofilms Stimulate Autoimmunity. *Immunity* **42**:  
37 1171–1184.
- 38 Gião, M.S. and Keevil, C.W. (2014) *Listeria monocytogenes* can form biofilms in tap water and  
39 enter into the viable but non-cultivable state. *Microb Ecol* **67**: 603–611.
- 40 Gjermansen, M., Nilsson, M., Yang, L., and Tolker-Nielsen, T. (2010) Characterization of  
41 starvation-induced dispersion in *Pseudomonas putida* biofilms: genetic elements and  
42 molecular mechanisms. *Mol Microbiol* **75**: 815–826.
- 43 Gjermansen, M., Ragas, P., Sternberg, C., Molin, S., and Tolker-Nielsen, T. (2005)  
44 Characterization of starvation-induced dispersion in *Pseudomonas putida* biofilms. *Environ*  
45 *Microbiol* **7**: 894–904.
- 46 Gjermansen, M., Ragas, P., and Tolker-Nielsen, T. (2006) Proteins with GGDEF and EAL  
47 domains regulate *Pseudomonas putida* biofilm formation and dispersal. *FEMS Microbiol*  
48 *Lett* **265**: 215–224.
- 49 Hancock, R.E.W. and Brinkman, F.S.L. (2002) Function of *Pseudomonas* porins in uptake and  
50 efflux. *Annu Rev Microbiol* **56**: 17–38.
- 51 Häußler, S., Ziegler, I., Löttel, A., Götz, F. V., Rohde, M., Wehmhöner, D., et al. (2003) Highly  
52 adherent small-colony variants of *Pseudomonas aeruginosa* in cystic fibrosis lung infection.  
53 *J Med Microbiol* **52**: 295–301.
- 54 Huang, M.Y., Woolford, C.A., May, G., Joel Mcmanus, C., and Mitchell, A.P. (2019) Circuit



- 1 diversification in a biofilm regulatory network. *PLoS Pathog* **15**: 1–26.
- 2 Ibáñez de Aldecoa, A.L., Zafra, O., and González-Pastor, J.E. (2017) Mechanisms and regulation  
3 of extracellular DNA release and its biological roles in microbial communities. *Front*  
4 *Microbiol* **8**: 1–19.
- 5 Kalia, D., Merey, G., Nakayama, S., Zheng, Y., Zhou, J., Luo, Y., et al. (2013) Nucleotide, c-di-  
6 GMP, c-di-AMP, cGMP, cAMP, (p)ppGpp signaling in bacteria and implications in  
7 pathogenesis. *Chem Soc Rev* **42**: 305–341.
- 8 Klausen, M., Gjermansen, M., Kreft, J.U., and Tolker-Nielsen, T. (2006) Dynamics of  
9 development and dispersal in sessile microbial communities: Examples from *Pseudomonas*  
10 *aeruginosa* and *Pseudomonas putida* model biofilms. *FEMS Microbiol Lett* **261**: 1–11.
- 11 Kos, B., Šušković, J., Vuković, S., Šimpraga, M., Frece, J., and Matošić, S. (2003) Adhesion and  
12 aggregation ability of probiotic strain *Lactobacillus acidophilus* M92. *J Appl Microbiol* **94**:  
13 981–987.
- 14 Liu, H.H., Yang, Y.R., Shen, X.C., Zhang, Z.L., Shen, P., and Xie, Z.X. (2008) Role of DNA in  
15 bacterial aggregation. *Curr Microbiol* **57**: 139–144.
- 16 Lysis, E.S.B. (2018) crossm. **84**: 1–18.
- 17 Mah, T.F.C. and O’Toole, G.A. (2001) Mechanisms of biofilm resistance to antimicrobial agents.  
18 *Trends Microbiol* **9**: 34–39.
- 19 Martínez-García, E., Aparicio, T., Goñi-Moreno, A., Fraile, S., and De Lorenzo, V. (2015) SEVA  
20 2.0: An update of the Standard European Vector Architecture for de-/re-construction of  
21 bacterial functionalities. *Nucleic Acids Res* **43**: D1183–D1189.
- 22 McDougald, D., Rice, S.A., Barraud, N., Steinberg, P.D., and Kjelleberg, S. (2012) Should we  
23 stay or should we go: Mechanisms and ecological consequences for biofilm dispersal. *Nat*  
24 *Rev Microbiol* **10**: 39–50.
- 25 Monds, R.D., Newell, P.D., Gross, R.H., and O’Toole, G.A. (2007) Phosphate-dependent  
26 modulation of c-di-GMP levels regulates *Pseudomonas fluorescens* Pf0-1 biofilm formation  
27 by controlling secretion of the adhesin LapA. *Mol Microbiol* **63**: 656–679.
- 28 Monier, J.M. and Lindow, S.E. (2003) Differential survival of solitary and aggregated bacterial  
29 cells promotes aggregate formation on leaf surfaces. *Proc Natl Acad Sci U S A* **100**: 15977–  
30 15982.
- 31 Musk, D.J., Banko, D.A., and Hergenrother, P.J. (2005) Iron salts perturb biofilm formation and  
32 disrupt existing biofilms of *Pseudomonas aeruginosa*. *Chem Biol* **12**: 789–796.
- 33 Nguyen, T.M., Telek, S., Zicler, A., Andres Martinez, J., Zacchetti, B., Kopp, J., et al. (2021)  
34 Reducing phenotypic and genotypic instabilities of microbial population during continuous  
35 cultivation based on stochastic switching dynamics. *bioRxiv* 2021.01.13.426484.
- 36 Nickel, P.I., Martínez-García, E., and De Lorenzo, V. (2014) Biotechnological domestication of  
37 pseudomonads using synthetic biology. *Nat Rev Microbiol* **12**: 368–379.
- 38 Oh, E., Andrews, K.J., and Jeon, B. (2018) Enhanced biofilm formation by ferrous and ferric iron  
39 through oxidative stress in *Campylobacter jejuni*. *Front Microbiol* **9**: 1–9.
- 40 Okshevsky, M., Regina, V.R., and Meyer, R.L. (2015) Extracellular DNA as a target for biofilm  
41 control. *Curr Opin Biotechnol* **33**: 73–80.
- 42 Paananen, A., Vuorimaa, E., Torkkeli, M., Penttilä, M., Kauranen, M., Ikkala, O., et al. (2003)  
43 Structural hierarchy in molecular films of two class II hydrophobins. *Biochemistry* **42**:  
44 5253–8.
- 45 Platt, R., Drescher, C., Park, S.K., and Phillips, G.J. (2000) Genetic system for reversible  
46 integration of DNA constructs and lacZ gene fusions into the *Escherichia coli* chromosome.  
47 *Plasmid* **43**: 12–23.
- 48 Qin, Z., Ou, Y., Yang, L., Zhu, Y., Tolker-Nielsen, T., Molin, S., and Qu, D. (2007) Role of  
49 autolysin-mediated DNA release in biofilm formation of *Staphylococcus epidermidis*.  
50 *Microbiology* **153**: 2083–2092.
- 51 Raneri, M., Pinatel, E., Peano, C., Rampioni, G., Leoni, L., Bianconi, I., et al. (2018)  
52 *Pseudomonas aeruginosa* mutants defective in glucose uptake have pleiotropic phenotype  
53 and altered virulence in non-mammal infection models. *Sci Rep* **8**: 1–15.
- 54 Ren, D., Madsen, J.S., de la Cruz-Perera, C.I., Bergmark, L., Sørensen, S.J., and Burmølle, M.

- 1 (2014) High-Throughput Screening of Multispecies Biofilm Formation and Quantitative  
2 PCR-Based Assessment of Individual Species Proportions, Useful for Exploring  
3 Interspecific Bacterial Interactions. *Microb Ecol* **68**: 146–154.
- 4 Rosenberg, M., Azevedo, N.F., and Ivask, A. (2019) Propidium iodide staining underestimates  
5 viability of adherent bacterial cells. *Sci Rep* **9**: 1–14.
- 6 Rueden, C.T., Schindelin, J., Hiner, M.C., DeZonia, B.E., Walter, A.E., Arena, E.T., and Eliceiri,  
7 K.W. (2017) ImageJ2: ImageJ for the next generation of scientific image data. *BMC*  
8 *Bioinformatics* **18**:
- 9 Sassi, H., Nguyen, T.M., Telek, S., Gosset, G., Grünberger, A., and Delvigne, F. (2019)  
10 Segregostat: a novel concept to control phenotypic diversification dynamics on the example  
11 of Gram-negative bacteria. *Microb Biotechnol* **12**: 1064–1075.
- 12 Schleheck, D., Barraud, N., Klebensberger, J., Webb, J.S., McDougald, D., Rice, S.A., and  
13 Kjelleberg, S. (2009) *Pseudomonas aeruginosa* PAO1 Preferentially Grows as Aggregates in  
14 Liquid Batch Cultures and Disperses upon Starvation. *PLoS One* **4**: e5513.
- 15 Schreiber, F., Littmann, S., Lavik, G., Escrig, S., Meibom, A., Kuypers, M.M.M., and  
16 Ackermann, M. (2016) Phenotypic heterogeneity driven by nutrient limitation promotes  
17 growth in fluctuating environments. *Nat Microbiol* **1**: 1–7.
- 18 Shi, L., Günther, S., Hübschmann, T., Wick, L.Y., Harms, H., and Müller, S. (2007) Limits of  
19 propidium iodide as a cell viability indicator for environmental bacteria. *Cytom Part A* **71**:  
20 592–598.
- 21 Sousa, A.M., Machado, I., and Pereira, M.O. (2011) Phenotypic switching: an opportunity to  
22 bacteria thrive. *Sci against Microb Pathog Commun Curr Res Technol Adv* 252–262.
- 23 Sriramulu, D.D., Lünsdorf, H., Lam, J.S., and Römling, U. (2005) Microcolony formation: A  
24 novel biofilm model of *Pseudomonas aeruginosa* for the cystic fibrosis lung. *J Med*  
25 *Microbiol* **54**: 667–676.
- 26 Stoodley, P., Sauer, K., Davies, D.G., and Costerton, J.W. (2002) Biofilms as complex  
27 differentiated communities. *Annu Rev Microbiol* **56**: 187–209.
- 28 Thomas, P., Popovic, N., and Grima, R. (2014) Phenotypic switching in gene regulatory  
29 networks. *Proc Natl Acad Sci U S A* **111**: 6994–6999.
- 30 Trappetti, C., Gualdi, L., Di Meola, L., Jain, P., Korir, C.C., Edmonds, P., et al. (2011) The  
31 impact of the competence quorum sensing system on *Streptococcus pneumoniae* biofilms  
32 varies depending on the experimental model. *BMC Microbiol* **11**: 75.
- 33 Vilain, S., Pretorius, J.M., Theron, J., and Brözel, V.S. (2009) DNA as an adhesin: *Bacillus*  
34 *cereus* requires extracellular DNA to form biofilms. *Appl Environ Microbiol* **75**: 2861–2868.
- 35 Volke, D.C., Friis, L., Wirth, N.T., Turlin, J., and Nikel, P.I. (2020) Synthetic control of plasmid  
36 replication enables target- and self-curing of vectors and expedites genome engineering of  
37 *Pseudomonas putida*. *Metab Eng Commun* **10**: e00126.
- 38 Volke, D.C. and Nikel, P.I. (2018) Getting Bacteria in Shape: Synthetic Morphology Approaches  
39 for the Design of Efficient Microbial Cell Factories. *Adv Biosyst* **2**: 1800111.
- 40 Whitchurch, C.B., Tolker-Nielsen, T., Ragas, P.C., and Mattick, J.S. (2002) Extracellular DNA  
41 required for bacterial biofilm formation. *Science (80- )* **295**: 1487.
- 42 Wirth, N.T., Kozaeva, E., and Nikel, P.I. (2020a) Accelerated genome engineering of  
43 *Pseudomonas putida* by I-SceI—mediated recombination and CRISPR-Cas9  
44 counterselection. *Microb Biotechnol* **13**: 233–249.
- 45 Wirth, N.T.,
- 46 Worsey, M.J. and Williams, A.P. (1975) Metabolism of toluene and xylenes by *Pseudomonas*  
47 *putida* (arvilla) mt 2: evidence for a new function of the TOL plasmid. *J Bacteriol* **124**: 7–  
48 13.
- 49 Yang, J.N., Wang, C., Guo, C., Peng, X.X., and Li, H. (2011) Outer membrane proteome and its  
50 regulation networks in response to glucose concentration changes in *Escherichia coli*. *Mol*  
51 *Biosyst* **7**: 3087–3093.
- 52 Yang, L., Barken, K.B., Skindersoe, M.E., Christensen, A.B., Givskov, M., and Tolker-Nielsen,  
53 T. (2007) Effects of iron on DNA release and biofilm development by *Pseudomonas*  
54 *aeruginosa*. *Microbiology* **153**: 1318–1328.

1  
2

1 **Table 1.** Bacterial strains and plasmids used in this study.

2

| Strain                   | Relevant characteristics <sup>a</sup>                                                                                                                                                                                                                                 | Reference or source                    |
|--------------------------|-----------------------------------------------------------------------------------------------------------------------------------------------------------------------------------------------------------------------------------------------------------------------|----------------------------------------|
| <i>E. coli</i> DH5α λpir | Cloning host; F <sup>-</sup> λ <sup>-</sup> <i>endA1 glnX44(AS) thiE1 recA1 relA1 spoT1 gyrA96(Nal<sup>R</sup>) rfbC1 deoR nupG</i> Φ80( <i>lacZΔM15</i> ) Δ( <i>argF-lac</i> )U169 <i>hsdR17(r<sub>K</sub><sup>-</sup> m<sub>K</sub><sup>+</sup>)</i> , λpir lysogen | (Platt <i>et al.</i> , 2000)           |
| <i>P. putida</i> KT2440  | Wild-type strain, derived from <i>P. putida</i> mt-2 (Worsey and Williams, 1975) cured of the TOL plasmid pWW0                                                                                                                                                        | (Bagdasarian <i>et al.</i> , 1981)     |
| LapA                     | Derivate of <i>P. putida</i> KT2440 with a clean deletion of <i>lapA</i> ( <i>PP_0168</i> )                                                                                                                                                                           | This study                             |
| DGC                      | Derivate of <i>P. putida</i> KT2440 harboring the plasmid pS638::DGC-244                                                                                                                                                                                              | This study                             |
| pSEVA638                 | <i>oriV</i> (pBBR1); <i>XylS/Pm</i> →multiple cloning site (MCS); Gm <sup>R</sup>                                                                                                                                                                                     | (Martínez-García <i>et al.</i> , 2015) |
| pS638::DGC-244           | Derived from pSEVA638 with insertion of DGC-244 into the MCS                                                                                                                                                                                                          | This study                             |
| pGNW2                    | <i>oriV</i> (R6K); <i>P<sub>EM14g</sub>BCD</i> → <i>msfGFP</i> ; Km <sup>R</sup>                                                                                                                                                                                      | (Wirth <i>et al.</i> , 2020a)          |
| pGNW2·Δ <i>lapA</i>      | Derived from pGNW2 with homologous flanking region to <i>lapA</i> ( <i>PP_0168</i> )                                                                                                                                                                                  | This study                             |
| pGNW2·Δ <i>oprB-I</i>    | Derived from pGNW2 with homologous flanking region to <i>oprB-I</i> ( <i>PP_1019</i> )                                                                                                                                                                                | This study                             |
| pGNW2·Δ <i>oprB-II</i>   | Derived from pGNW2 with homologous flanking region to <i>oprB-II</i> ( <i>PP_01445</i> )                                                                                                                                                                              | This study                             |
| pGNW2·Δ <i>oprB-III</i>  | Derived from pGNW2 with homologous flanking region to <i>oprB-III</i> ( <i>PP_3570</i> )                                                                                                                                                                              | This study                             |

1

2 **Table 2.** Oligonucleotides used in this study<sup>a</sup>.

| Oligonucleotide | Sequence (5'→3')                                                                        | Use                                                                |
|-----------------|-----------------------------------------------------------------------------------------|--------------------------------------------------------------------|
| P1              | AAA <i>GAG CTC</i> TTA <u>GGA GGA AAA ACA</u> <b>TAT</b> GAA<br>AAT CTC AGG CGC CCG GAC | Amplification of<br><i>dgcA0240</i>                                |
| P2              | AAA <i>GGA TCC</i> TCA AGC GCT CCT GCG CTT G                                            |                                                                    |
| P3†             | AGA TCC UAT TCA TCT ATA GAG TGC GGA TTC                                                 | Amplification of<br>genomic regions<br>adjacent to <i>lapA</i>     |
| P4†             | ATT GGA CUC TCC GTGTGACCCGATGG                                                          |                                                                    |
| P5†             | AGT CCA AUG TGA CAG ACC ACC GGG GCC                                                     |                                                                    |
| P6†             | AGG TCG ACU TCG ATT GGT CGA CGG GTA CG                                                  |                                                                    |
| P7†             | AGA TCC UCC GCA GCA GAT CTA CAA CG                                                      | Amplification of<br>genomic regions<br>adjacent to <i>oprB-I</i>   |
| P8†             | ACA TCC CUT TGC GTC CTC TTT                                                             |                                                                    |
| P9†             | AGG GAT GUG AGG CAA CTT GTT GTA AAT TTA<br>CG                                           |                                                                    |
| P10†            | AGG TCG ACU GCT GTC CTG ATG TTC GGT G                                                   |                                                                    |
| P11†            | AGA TCC UAA ACC CGC CAA CGA AAC C                                                       | Amplification of<br>genomic regions<br>adjacent to <i>oprB-II</i>  |
| P12†            | ACA TGA GAU AGC GCT ATC TTT TGATT                                                       |                                                                    |
| P13†            | ATC TCA TGU AAC CCC TTT TTT GAC CTG ACG                                                 |                                                                    |
| P14†            | AGG TCG ACU GTA GGC CTG CCA TTC GC                                                      |                                                                    |
| P15†            | AGA TCC UAT GCC GTG AAC AAG AAC CG                                                      | Amplification of<br>genomic regions<br>adjacent to <i>oprB-III</i> |
| P16†            | ATT ACA GAA UCT CGG GTT GTC TTT G                                                       |                                                                    |
| P17†            | ATT CTG TAA UGT GAA CCG CCG GGG CCG C                                                   |                                                                    |
| P18†            | AGG TCG ACU GCT TCG ATC CAC CGT TCT C                                                   |                                                                    |

3 <sup>a</sup> Oligonucleotides designed for *USER* cloning are indicated with a † symbol. Restriction sites are shown in  
4 italics, ribosomal binding site is underlined and start codon is shown in bold.

5

6

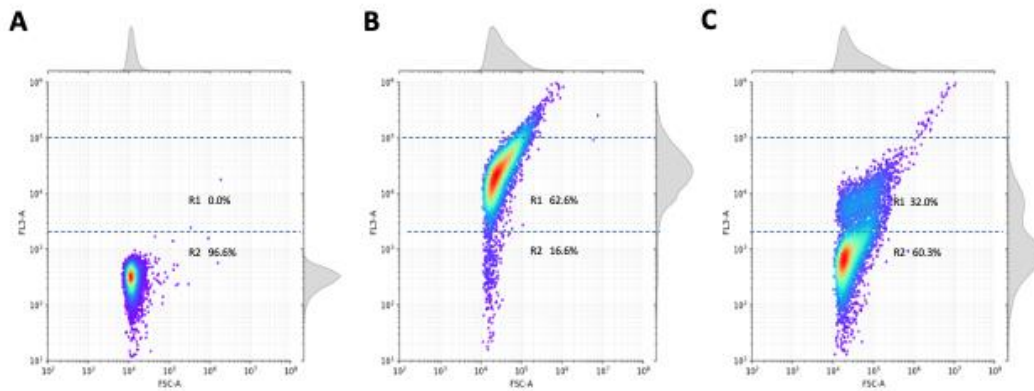

1  
2 **Figure 1.** Flow cytometry analysis illustrating the effects of DNase treatment on PI-positive  
3 fraction of biofilm sample. **A** Negative control shows non-stained cells according to R1 region on  
4 the FC profiles. **B** Sample showing high PI uptake, before treated by the DNase enzyme, the  
5 majority of microbial cells were located in the R1 region (62.6%). **C** Sample After treating with  
6 DNase enzyme, the PI-positive fraction decreases significantly (32.0%), as a result of eDNA  
7 hydrolysis.

8  
9

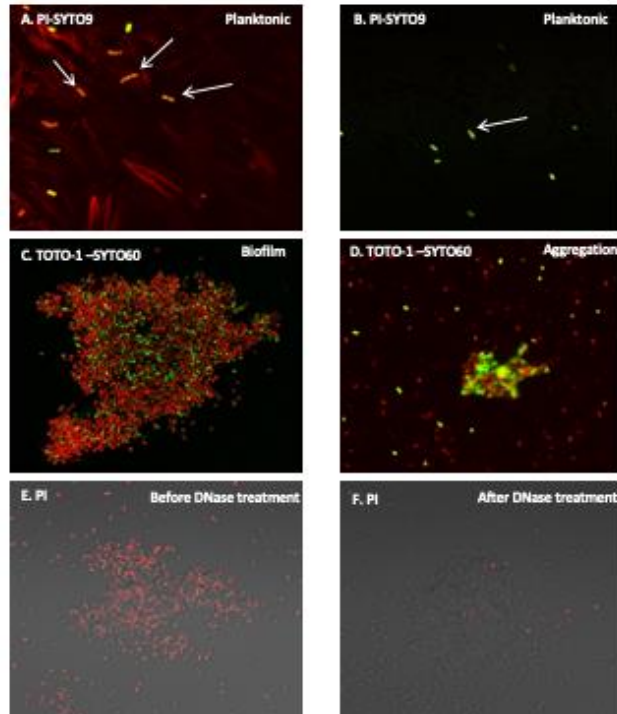

1  
2 **Figure 2.** Confocal laser scanning microscopy (CSLM) images of *P. putida* KT2440 (planktonic,  
3 aggregation and biofilm) samples. **A-B** Planktonic sample co-stained with propidium iodide (PI)  
4 and SYTO9. **C** Biofilm cells (co-stained with TOTO-1 and SYTO60). **D** Cell aggregates stained  
5 with a combination of TOTO-1 and SYTO60. **E** Biofilm cells stained with PI before treatment with  
6 DNase enzyme. **F** Biofilm cells stained with PI after being treated with DNase enzyme.

7  
8



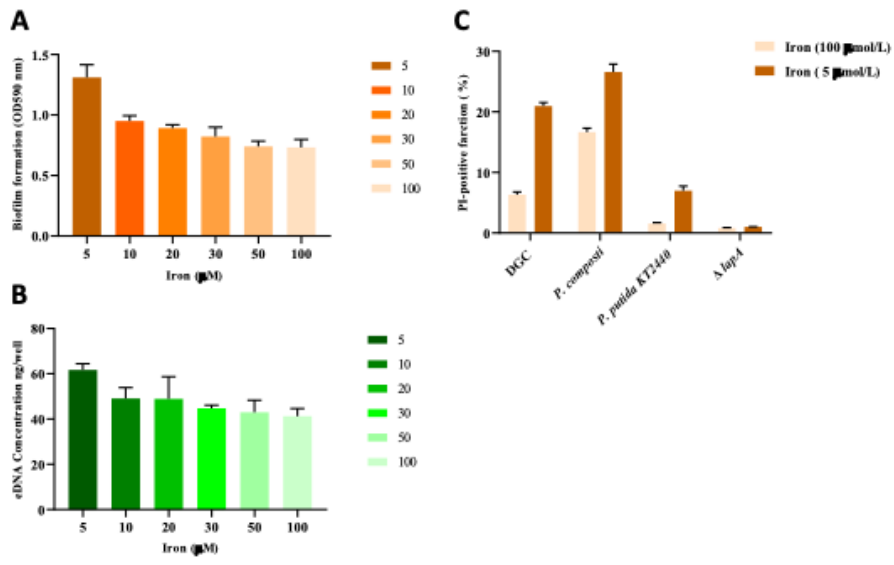

1  
2 **Figure 3.** Effect of iron concentration on biofilm formation, extracellular DNA and the PI-positive  
3 subpopulation. **A** Comparison of biofilm formation ability of *P. putida* KT2440 in the presence of  
4 different iron concentrations. **B** eDNA quantity in the presence of different iron concentrations. **C**  
5 Comparison of PI-positive percentage among DGC, *P. composti*, *P. putida* KT2440 and  $\Delta lapA$  in  
6 the presence of high (100 μM) and low iron concentration (5 μM).  
7  
8  
9  
10  
11  
12

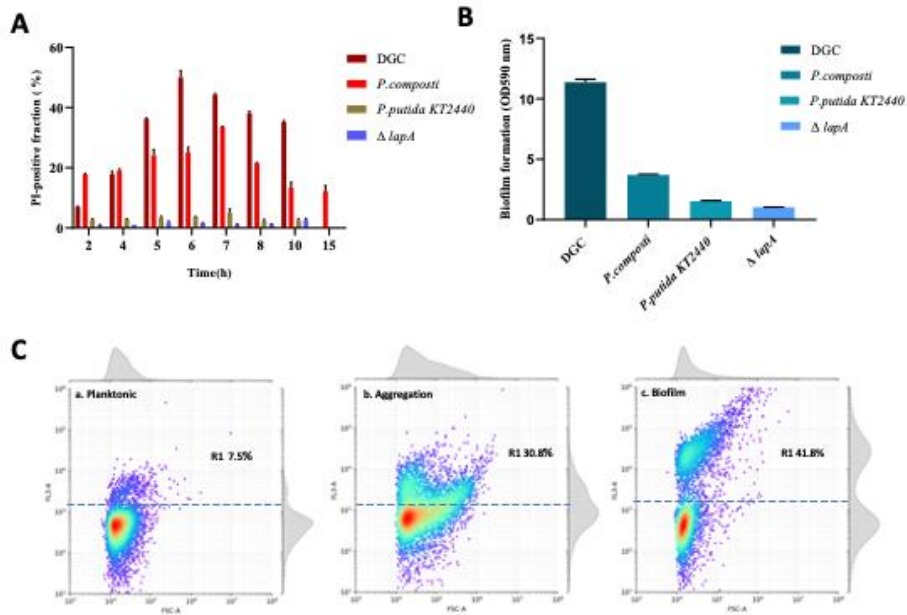

1  
2 **Figure 4.** Comparison of PI-positive subpopulation percentage and biofilm formation capability  
3 among DGC, *P. composti*, *P. putida* KT2440,  $\Delta lapA$ . **A** Comparison of PI-positive fraction (%)  
4 cells during batch phase,  $N \geq 3$ . **B** Biofilm formation ability after 48h,  $N \geq 5$ . **C** Flow cytometry  
5 comparison of PI-positive subpopulation for planktonic, aggregated and biofilm sample from DGC  
6 strain.  
7

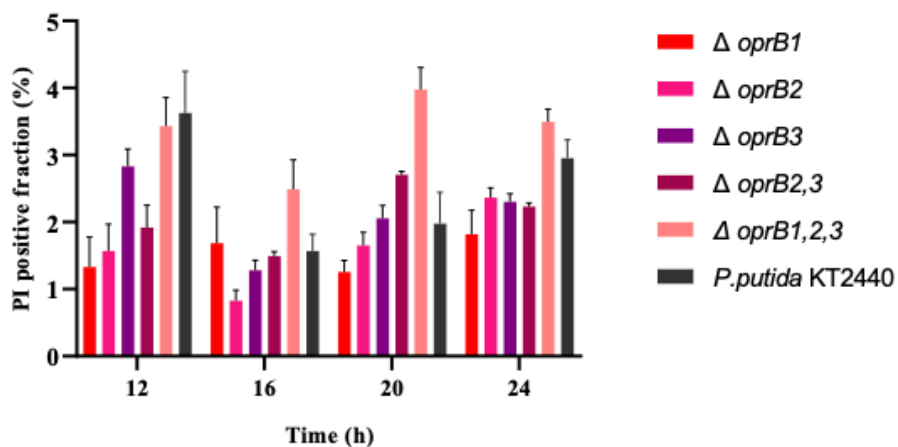

1  
2 **Figure 5.** Effects of deletion porins group B on outer membrane permeability in *P. putida* KT2440  
3 mutant,  $N \geq 3$ .  
4

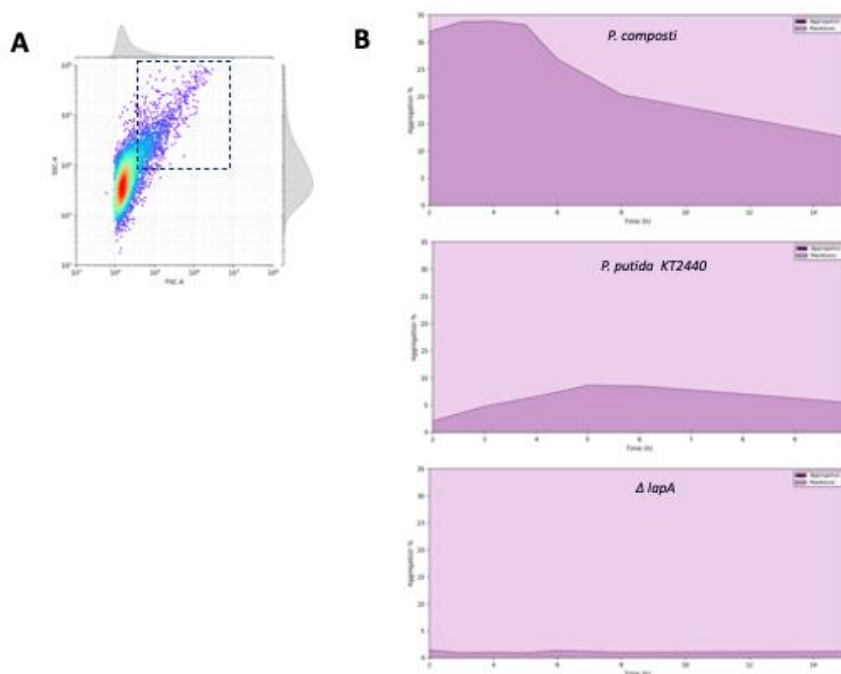

5  
6 **Figure 6.** A Gating the aggregation subpopulation on flow cytometry based on FSC and SSC  
7 signals. The blue dotted box separates the aggregation fraction from single cells. B Comparison of

1 the degree of aggregation for *P. composti*, *P. putida* KT2440 and its  $\Delta lapA$  derivative by FC,  $N \geq$   
2 2.  
3

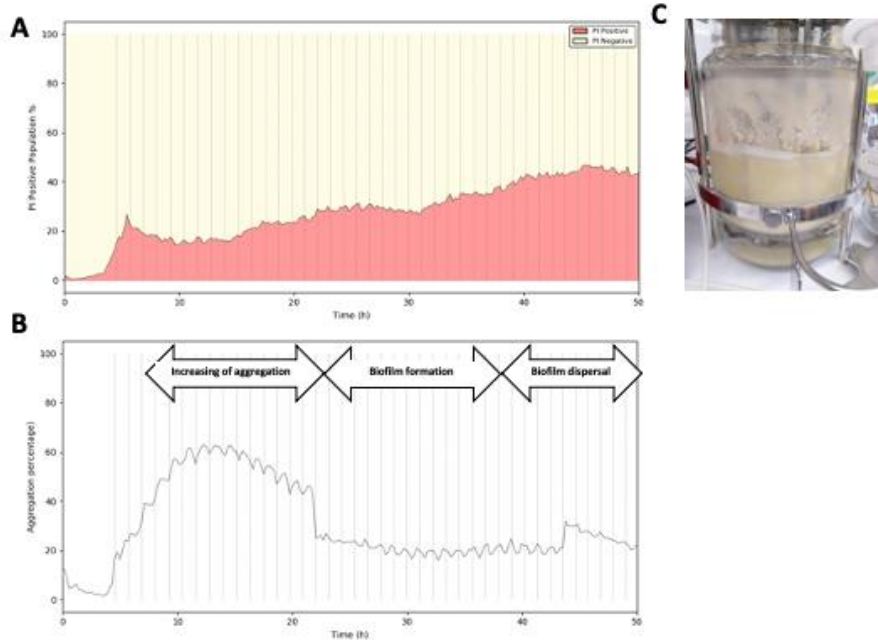

4  
5 **Figure 7.** Dynamics of phenotypic diversification in pulsed continuous cultivation system in *P.*  
6 *putida* KT2440. **A** PI-positive dynamic in continuous feast and famine nutrient cycle during 50 h.  
7 **B** Aggregation fluctuation dynamic during 50 h in automated pulsed continuous-culture bioreactor.  
8 **C** Macroscopic view of biofilm formation layer on the wall of the 2-L bioreactor after 50 h of  
9 cultivation.

10  
11  
12  
13  
14  
15  
16  
17  
18

1 **Supplemental information**

2

3 **Table S1:** comparison of auto-aggregation ability of different strains: *P. putida* DGC (KT2440  
4 background), *P. putida*  $\Delta lapA$  (KT2440 background), *P. putida* KT2440 and *P. composti*. Values in a  
5 row that are not preceded by the same letter are significantly different ( $p \leq 0.01$ )

| Phenotypes                            | Strains                 | Autoaggregation (%)     |
|---------------------------------------|-------------------------|-------------------------|
| Agg+<br>( Strongly autoaggregation )  | DGC                     | 100.00±0 <sup>a</sup>   |
| Agg-<br>(non-autoaggregation )        | $\Delta lapA$           | 20.89±1.84 <sup>d</sup> |
| Agg +/-<br>(Moderate autoaggregation) | <i>P. putida</i> KT2440 | 37.67±2.96 <sup>c</sup> |
|                                       | <i>P. composti</i>      | 55.67±1.53 <sup>b</sup> |

6

7

8

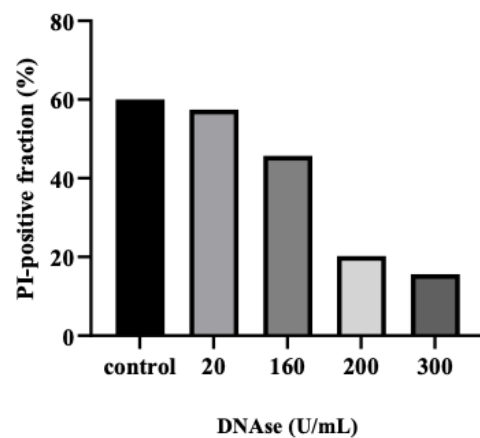

9

10 **Figure S1:** effect of different DNase I concentrations on the PI-positive fraction.

1

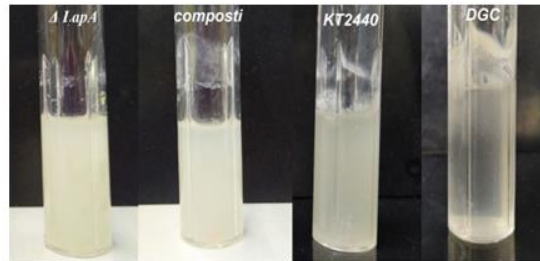

2

3 **Figure S2:** macroscopic view of biofilm formation on the wall of mini bioreactor vessel among  
4  $\Delta lapA$ , *P. composti*, *P. putida* KT2440 and DGC at the end of the batch phase.

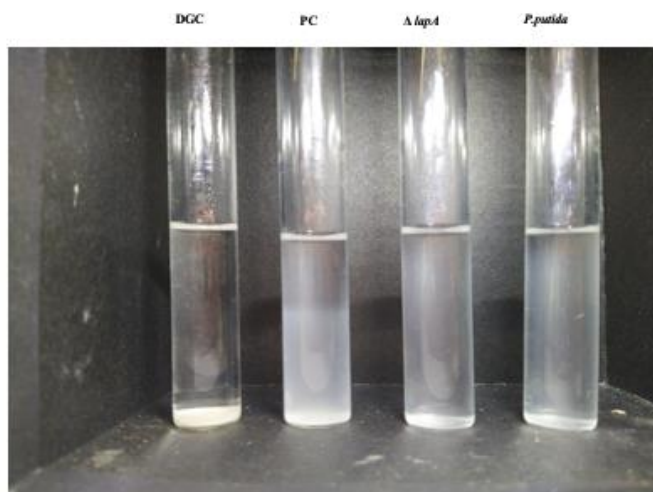

5

6 **Figure S3:** visual inspection the auto-aggregation ability of different strains: *P. putida* DGC (KT2440  
7 background), *P. putida*  $\Delta lapA$  (KT2440 background), *P. putida* KT2440 and *P. composti*. Auto-  
8 aggregation ability has been determined over a period of 24h at room temperature based on their  
9 sedimentation characteristics

1  
2  
3  
4  
5  
6  
7  
8  
9  
10

**Movie S1:** evolution of PI-positive and aggregates subpopulations, based on individual dotplots with forward scatter (FSC) as x-axis and PI fluorescence as y-axis. These dotplots were acquired at an interval of 12 minutes by on-line flow cytometry and were further assembled into a single .avi movie file
